# Supplementary material
Source: PubMed Central journal article supplement (PMC4386460)
Supplement: MCB.00838-14_zmb999100628so1.pdf [file MCB.00838-14_zmb999100628so1.pdf]

## Supplemental information

### 14-3-3s play a role in cell cycle by shielding Cdt2 from ubiquitin-mediated degradation

Ashraf Dar, David Wu, Nicholas Lee, Etsuko Shibata and Anindya Dutta

Department of Biochemistry and Molecular Genetics, University of Virginia School of Medicine, Charlottesville, Virginia, USA

**Table S1**

| Target Gene      | siRNA Sequence             |
|------------------|----------------------------|
| GL2 (Luciferase) | CGTACGCGGAATACTTCGA        |
| Pan-14-3-3       | AAGCTGGCCGAGCAGGCTGAGCGATA |
| 14-3-3ε          | CTTAAAGGCAAGAGTGAAT        |
| 14-3-3γ          | AAGAGCTATATCCTTAACCAT      |
| 14-3-3γ#2        | GCAAAGTGTCTACCTGAA         |
| 14-3-3ε#2        | GGAAGGAGGCUGCGGAGAA        |
| 14-3-3θ          | GCCTACCAAGAGGCGTTTGATATAA  |
| 14-3-3ζ          | ACGGTTCACATTCCATTAT        |
| Cdt2             | ATACAAGAGTGACTCTATA        |
| Set8             | GATTGAAAGTGGGAAGGAA        |

**Table S2**

| Primer name | Sequence (5'-3')       |
|-------------|------------------------|
| Actin-F     | TGAAGGCTTTTGGTCTCCCTG  |
| Actin-R     | TCAACTGGTCTCAAGTCAGTGT |
| Cdt2-F      | CTTACAGTGGCGGGAGTTGG   |
| Cdt2-R      | GCATCAGGGTCGGAGGAAAA   |
| Set8-F      | GGGGAACCATTAGCCGGAA    |
| Set8-R      | TGTTCCCTCGGACTTCATGGC  |
| P21-F       | CTGGAGACTCTCAGGGTCGAAA |
| P21-R       | GATTAGGGCTTCCTCTTGAGAA |
